# Supplementary material
Source: Research Square preprint supplement (doi:10.21203/rs.3.rs-9181920/v1)
Supplement: Supplementary file 1 [file faa3ce7342238afd627f1410.docx]

**Appendix. Semi-Structured Interview Guide**

**Title:** Maternal, Reproductive, Family Planning, and Mental Health Care Experiences among Women with Migration Histories in Germany
**Target group:** First-generation women with migration histories who have accessed maternal and/or reproductive healthcare in Germany
**Estimated duration:** 30–90 minutes
**Interview approach:** Questions are open-ended and exploratory. Interviewers should encourage participants to describe their experiences across the continuum of care, before pregnancy, during pregnancy, childbirth, the postpartum period, family planning, and emotional well-being, using prompts such as *what, how, where, when,* and *why*. Probing questions may be used as needed. Interviews should be conducted in a respectful, non-judgmental, culturally sensitive, and trauma-informed manner. Participants may decline to answer any question or stop the interview at any time.

**Section A. Participant Demographic Information**

*(Completed by the researcher)*

**Participant ID:** ______
**Interview date:** ______
**Interview location/mode:** __________________
**Interviewer:** __________________

**Socio-Demographic Characteristics**

1. Age: ______ years
2. Country of origin: __________________
3. Native language(s): __________________
4. Years living in Germany: ______
5. Years living in Berlin: ______
6. Reason for migration: __________________
   *(e.g., asylum/protection, family reunification, education, employment, other)*
7. Marital status:
   □ Married □ Single □ Co-habiting □ Divorced/Separated □ Widowed □ Other: ______
8. Highest level of education:
   □ No formal education □ Primary □ Secondary □ Tertiary □ Other: ______
9. Additional training:
   □ Yes (specify): __________ □ No □ N/A
10. Employment status:
    □ Employed □ Not employed □ Job seeker □ Parental/maternity leave □ Other: ______

**Section B. Medical, Reproductive, and Family Planning Profile**

*(Completed with sensitivity; participant may skip any question)*

1. Gravida (total number of pregnancies): ______
2. Parity (total number of births): ______
3. Number of living children: ______
4. Number of miscarriages: ______
5. Number of abortions: ______
6. Current reproductive status:
   □ Pregnant □ Postpartum □ Parenting child under two years □ Not currently pregnant □ Recent abortion □ Other: ______
7. Age at menarche: ______
8. Last menstrual period (if relevant and participant is comfortable sharing): ______
9. Current or past pregnancy complications: __________________
   *(e.g., gestational diabetes, pre-eclampsia, anemia, hypertension, other)*
10. Existing health conditions/comorbidities: __________________
11. Cervical cancer screening history and date (if known): __________________
12. Currently sexually active: □ Yes □ No □ Prefer not to say
13. Current family planning/contraceptive method (if any): __________________
14. Lifetime family planning methods used: __________________
    *(e.g., condoms/barrier methods, withdrawal/traditional methods, pills/hormonal methods, IUD, mixed methods, other)*

**Section 1. Migration Background and Social Context**

*(Individual pathways; social context)*

- Can you tell me a little about where you were born and raised?
- What were your reasons for coming to Germany?
- How long have you been living in Germany, and how has that experience been for you overall?
- How would you describe your experience as a woman with a migration history living in Germany?
- What have been some of the main challenges?
- What have been some positive experiences or sources of strength?
- Can you tell me about your family and social situation here?
- Who are the people you usually rely on for support?
- Are these support people mainly in Germany, in your country of origin, or elsewhere?

**Section 2. Maternal and Reproductive Healthcare Across the Continuum of Care**

*(WHO Quality of Care Framework; continuum of care; provision and experience of care)*

- You have received maternal or reproductive healthcare in Germany. Can you describe your experience overall?
- Thinking about the whole period before pregnancy, during pregnancy, during birth, and after birth, how would you describe the care you received?
- Overall, would you say your experience was mostly positive, mostly negative, mixed, or something else? Why?

**Before Pregnancy / Early Reproductive Care**

- Before becoming pregnant, what kinds of reproductive or women’s health services did you use in Germany, if any?
  *(e.g., gynecological care, contraception counseling, cervical screening, fertility advice, preconception care)*
- How easy or difficult was it to access these services?
- Did these services help you prepare for pregnancy or make decisions about your reproductive health? Why or why not?

**Prenatal / Antenatal Care**

- Can you describe your experience of care during pregnancy?
- How easy or difficult was it to find a provider for antenatal care?
- Did you feel the pregnancy care you received was regular, well-organized, and timely?
- Were tests, check-ups, and referrals explained clearly to you?
- Did you feel safe and medically well cared for during pregnancy? Why or why not?
- Did you receive enough information about your pregnancy, possible complications, childbirth, and what to expect later?
- Did you feel listened to, respected, and taken seriously during antenatal care?
- Were there any moments during pregnancy care when you felt confused, unsupported, or left out of decisions?

**Intrapartum / Childbirth Care**

- Can you tell me about your experience during labor and birth?
- Did you feel safe during childbirth? Why or why not?
- Did healthcare providers explain what was happening during labor and delivery in a way you could understand?
- Were procedures, interventions, or decisions explained to you before they happened?
- Did you feel involved in decisions during childbirth?
- Did you feel respected, supported, and treated with dignity during labor and birth?
- Were there moments when you felt afraid, powerless, ignored, or unable to ask questions?
- How would you describe the emotional support you received during labor and delivery?

**Postnatal / Postpartum Care**

- Can you describe the care you received after giving birth?
- What kind of support did you receive after leaving the hospital?
- Did you receive enough information about your own recovery after birth?
- Did you receive enough information about newborn care, breastfeeding, warning signs, mental health, or follow-up care?
- How easy or difficult was it to access postnatal care, midwife care, follow-up appointments, or support services?
- Did you feel the postnatal period received enough attention from the healthcare system? Why or why not?
- Were there needs you had after birth that were not addressed?

**Continuity and Coordination Across Stages**

- Looking across pregnancy, childbirth, and the period after birth, where did care feel strongest?
- Where did care feel weakest or most difficult?
- Were there points where care felt disconnected or fragmented?
- Did you ever have to repeat your history or explain things again because providers did not seem connected to each other?
- How well did services connect across different stages of care?
- What would have made care across the whole journey more continuous and coordinated?

**Section 3. Navigation, Communication, and Understanding**

*(Continuity of care; communication; language accessibility; system navigation)*

- How easy or difficult was it for you to understand how the maternal healthcare system in Germany works?
- When you needed care, how did you know where to go next?
- Were referrals, appointments, and next steps explained clearly to you?
- Were there times when you felt lost in the system or unsure what to do?
- Did you ever miss or delay care because the system was difficult to navigate?
- Who or what helped you understand the system?
  *(e.g., partner, friends, NGO, midwife, doctor, online resources)*
- How easy or difficult was it to understand the information given to you during pregnancy, birth, or after birth?
- Did providers explain medical terms, procedures, or risks in a way that made sense to you?
- Were there times when you left an appointment without fully understanding what had been said?
- Did language differences ever affect your care? How?
- Were professional interpreters offered when needed?
- If you used family members, friends, or others to translate, how did that affect your privacy, confidence, or understanding?
- Did you receive information about your rights, available services, or entitlements within the healthcare system?
- What information was most helpful to you?
- What information was missing?

**Section 4. Experience of Care, Relationships, and Support**

*(Respect, trust, agency, person-centered care; relationships and networks)*

- How did healthcare providers treat you during pregnancy, childbirth, and after birth?
- Did you feel respected as a person? Why or why not?
- Did you feel your concerns were taken seriously?
- Did you feel comfortable asking questions or expressing your preferences?
- Did you trust the providers caring for you? Why or why not?
- Were you involved in decisions about your care? Can you describe an example?
- Were there times when you felt rushed, dismissed, or not listened to?
- Were there times when you felt especially well supported, cared for, or reassured? What made the difference?
- Did you feel that providers understood your emotional needs as well as your medical needs?
- Did you feel you had control or agency during important moments of care, especially during childbirth?
- Who supported you during pregnancy, birth, postpartum, or other reproductive health experiences?
- What role did your partner, family members, friends, or community members play?
- Have community groups, NGOs, migrant organizations, or online spaces helped you in any way with reproductive or maternal health? How?
- What do you think about having a support person, such as a doula or birth supporter, from your own community?
- What kind of support would you want from such a person?

**Section 5. Cultural Responsiveness, Safety, and Structural Conditions**

*(Cultural responsiveness; non-discrimination; systems of power; social determinants)*

- Did you feel your cultural background, language, values, or preferences were understood and respected during care?
- Were there cultural practices or expectations related to pregnancy, childbirth, or postpartum care that were important to you?
- Were these acknowledged or accommodated in Germany? Why or why not?
- Did you ever feel that providers made assumptions about you based on your nationality, language, religion, race, or migration history?
- Did you experience any behavior that felt discriminatory, stereotyping, or unfair?
- How did that affect your trust in care?
- Do you think your migration history has affected the way you access or experience reproductive or maternal healthcare in Germany? How?
- Have factors such as legal status, language ability, financial situation, housing, employment, insurance, childcare, or transport affected your access to care?
- Have you ever been unsure whether you were entitled to certain services or support?
- How do broader life circumstances, such as unstable housing, financial strain, childcare, or social isolation, affect your ability to manage maternal or reproductive health?
- What changes in the health system or social services would make the biggest difference for women with migration histories?

**Section 6. Family Planning Knowledge, Practices, and Preferences**

*(Individual pathways; informed choice; contraceptive autonomy)*

- What does “family planning” mean to you?
- What does it mean to you to be able to plan if or when to have children?
- What family planning or contraceptive methods do you know about?
- Where have you learned about these methods?
  *(e.g., doctors, school, family, friends, internet, social media, apps, NGOs, community groups)*
- How much do you feel you know about family planning options and services in Germany?
- Do you know where to go for advice or contraception?
- Have you ever used any family planning or contraceptive method?
- What methods have you used in your lifetime?
- What method are you currently using, if any?
- Are there times when you are not using any method? Can you tell me about that?
- Have you ever used more than one method at the same time or changed methods over time? What led to that?
- Have you used any traditional or natural methods, such as withdrawal, calendar tracking, or fertility awareness? What was your experience?
- How did you decide whether to use a method or not?
- What matters most to you when choosing a method?
  *(e.g., effectiveness, side effects, cost, ease of use, partner acceptance, breastfeeding, health concerns, religion, future fertility)*
- Are there methods you prefer, and why?
- Are there methods you do not want to use, and why?
- Have your family planning needs or preferences changed over time?
  *(e.g., before migration, after migration, after marriage, after pregnancy, during breastfeeding, after childbirth, after miscarriage or abortion)*
- Do you feel the methods available to you match your personal needs and life situation? Why or why not?
- How have cultural beliefs, health priorities, or personal autonomy influenced your contraceptive choices?

**Section 7. Access, Quality, and Autonomy in Family Planning Care**

*(Rights-based family planning; access barriers and facilitators; relationships and systems of power)*

- How easy or difficult has it been for you to access family planning or reproductive health services in Germany?
- Can you describe what happens when you try to get contraception, advice, or reproductive healthcare?
- Where do you usually go for these services?
  *(e.g., gynecologist, family doctor, clinic, counseling center, pharmacy, NGO, hospital, online service)*
- How easy or difficult is it to get appointments?
- Are the services and contraceptive methods you want usually available when you need them?
- Have costs, insurance rules, paperwork, or legal issues affected your choices or access?
- Have language barriers made access harder? Were interpretation services offered when needed?
- Have you ever delayed, interrupted, or stopped using a method because of cost, bureaucracy, availability, or difficulty navigating the system?
- When you discuss family planning with healthcare providers, how much information do they usually give you?
- Do they explain different methods, benefits, risks, side effects, and alternatives clearly?
- Do you feel you receive enough information to make an informed choice?
- Do providers usually present several options, or do they mainly recommend one method?
- Have you ever felt pushed toward a method you did not want?
- Have your preferences been respected? Can you describe an example?
- How do your partner’s views or other people’s opinions affect family planning decisions?
- Do you feel able to express your own preferences freely? Why or why not?
- Do you think family planning is mainly treated as a woman’s responsibility, a man’s responsibility, or a shared responsibility? Why?
- What does respectful and high-quality family planning care look like to you?

**Section 8. Maternal Mental Health, Emotional Well-Being, and Psychosocial Support**

*(WHO mhGAP Intervention Guide; WHO maternal mental health guidance; trauma-informed and person-centered care)*

**Opening transition for interviewers:**
*I would now like to ask about emotional well-being during pregnancy and after birth. Some of these questions are personal, so please only share what you feel comfortable sharing. You may skip any question.*

- How did you feel emotionally during pregnancy?
- How did you feel emotionally after giving birth?
- Were there times when you felt emotionally well and supported? What helped?
- Were there times when you felt overwhelmed, stressed, sad, anxious, or emotionally exhausted?
- Did these feelings change over time during pregnancy or after birth? How?
- During pregnancy or after birth, were there times when you felt persistently sad, low, hopeless, very worried, or unable to relax?
- Did you ever have difficulties sleeping, changes in appetite, trouble concentrating, or feel unable to cope?
- How did emotional stress or mental health difficulties affect your everyday life, your relationships, or your ability to care for yourself or your baby?
- Were there times when your distress felt severe or frightening?
- Did you ever have thoughts that life was not worth living, or thoughts of harming yourself?
- If yes, did you tell anyone or receive any support?
- Were there any times when you felt unsafe at home or in your relationships during pregnancy or after birth?
- Do you think past difficult experiences affected your emotional well-being during pregnancy or after birth? How?
  *(e.g., migration stress, loss, violence, trauma, miscarriage, difficult birth, social isolation, legal uncertainty, financial stress)*
- When you were feeling stressed or emotionally unwell, did you seek help from anyone? Who?
- Did anyone in the healthcare system ask you directly about your mood, stress, anxiety, or mental health?
- Did you ever receive counseling, psychological support, medication, peer support, or referral for emotional difficulties?
- Was it easy or difficult to access this support? Why?
- Did maternal healthcare providers pay attention to your emotional well-being as well as your physical health?
- Did you feel comfortable discussing emotional or mental health concerns with them? Why or why not?
- Were there times when emotional distress was ignored, minimized, or treated as unimportant?
- What should maternal healthcare services do differently to support women’s mental health during pregnancy and after birth?

**Section 9. Unmet Need, Care Gaps, Autonomy, and Recommendations**

*(Synthesis section)*

- Have there been times when you wanted to avoid pregnancy, delay pregnancy, or plan pregnancy differently, but could not do so in the way you wanted?
- What got in the way?
  *(e.g., information gaps, provider attitudes, language, cost, lack of access, partner influence, fear of side effects, legal or insurance barriers, availability of methods)*
- Looking at maternal care more broadly, where do you think the biggest gaps are for women with migration histories in Germany?
- In your view, what does it mean for a woman to have real choice, control, dignity, and support in maternal and reproductive healthcare?
- What would help women with migration histories have better access to maternal, reproductive, family planning, and mental healthcare in Germany?
- What should healthcare providers do differently?
- What should clinics, hospitals, insurers, government services, or community organizations do differently?
- What kind of information, support, or services would make the biggest difference for you personally?
- What would you suggest to improve maternal healthcare and family planning services for other women in similar situations?

**Closing Question**

- Is there anything else you would like to share about your experiences with maternal care, reproductive health, family planning, or emotional well-being that we have not discussed?

**Suggested Probing Prompts for Interviewers**

- “Can you tell me more about that?”
- “Can you give an example?”
- “What happened next?”
- “How did that make you feel?”
- “Why do you think that happened?”
- “How did you respond?”
- “What made that easy or difficult?”
- “Who was involved in that situation?”
- “What would have helped in that moment?”

**Interviewer Notes**

- Use inclusive, non-stigmatizing language throughout.
- Avoid assumptions about legal status, religion, relationship dynamics, contraceptive use, fertility intentions, or migration pathway.
- Prioritize participant comfort, privacy, and autonomy.
- Sensitive topics such as miscarriage, abortion, trauma, violence, discrimination, coercion, self-harm, or mental health concerns should be approached gently and only explored if the participant is comfortable.
- Where interpreters are used, ensure confidentiality, accuracy, and participant-centered communication.
- Attend to transitions across the continuum of care, especially where participants describe fragmentation, confusion, or discontinuity.
- Allow participants to define what “quality,” “support,” “respect,” “good care,” and “autonomy” mean in their own words.
- If a participant becomes visibly distressed, pause the interview, offer a break, remind her that she may skip questions or stop at any time, and continue only if she wishes. If she expresses immediate risk of self-harm or current danger, follow the study safety and referral protocol.
